# Supplementary material for: Sex and HDAC4 Differently Affect the Pathophysiology of Amyotrophic Lateral Sclerosis in SOD1-G93A Mice
Source: MDPI journal article supplement (doi:10.3390/ijms24010098), 2022-12-21
Supplement: s1 [file s1]

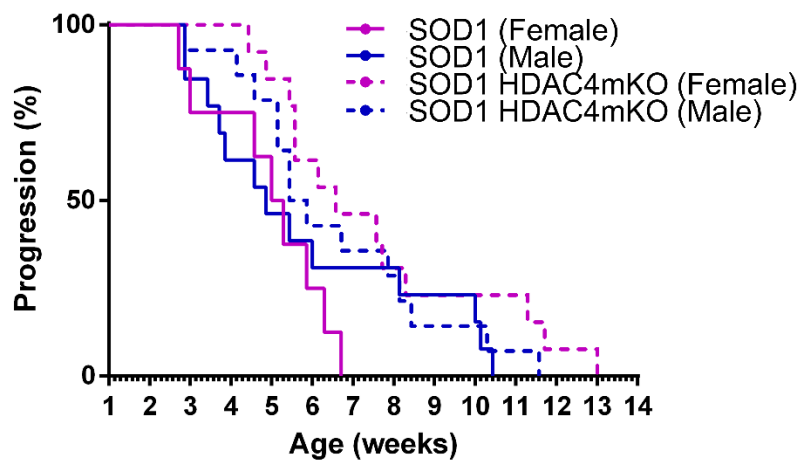

**Figure S1.** Neither sex nor HDAC4 affects ALS progression in SOD1 mice. ALS progression of SOD1 and SOD1 HDAC4mKO mice. n=14 males for each genotype; n=12 females for each genotype.
